# Supplementary material
Source: bioRxiv or medRxiv preprint supplement (https://www.biorxiv.org/highwire/filestream/48397/field_highwire_adjunct_files/0/162958-1.pdf)

## Supplemental Figure Legends

**Figure S1. Identification of RanBP5 as interacting protein via mass spectrometry, and Stx3 constructs. (A)** Table showing RanBP5 tryptic-digested peptides co-immunoprecipitated with Stx3. Peptides identified by LC-MS/MS. **(B)** Schematic and nomenclature of Stx3 constructs.

**Fig. S2. Confirmation of binding to candidate co-activator proteins.** GST-Stx3S and Gal4 or Gal4-candidate protein were co-expressed in HEK293T cells and lysates subjected to precipitation via glutathione-coated sepharose. Lysates and bead precipitates were subjected to SDS-PAGE and immunoblotted for Gal4 or GST.

**Figure S3. Candidate shRNA oligonucleotides. (A)** Alignment of exon 9 - exon 11 junction with candidate shRNA oligonucleotides. Each oligonucleotide is 21bp long and predicted to silence Stx3S specifically. **(B)** Immunoprecipitation and immunoblot of HEK293T cells transduced with lentivirus delivering candidate shRNA oligo as indicated.

**Figure S4. Cleaved Caspase-3 staining. (A)** Representative immunocytochemistry images of 5-day cultures of SCR or Stx3S KD Caco2 cells stained for cleaved Caspase-3 (green) and DAPI (blue). Scale bar 20 $\mu$ m. **(B)** Cleaved Caspase-3 quantification positive proportion for SCR and Stx3S KD cells. Bars represent the means and SEM of quadruplicate samples.

**A**

| Sequence position | m/z    | Peptide sequence     |
|-------------------|--------|----------------------|
| 45-53             | 538.61 | ITFLLQAIR            |
| 63-70             | 459.75 | QMAAVLLR             |
| 111-121           | 630.81 | KICDIAAELAR          |
| 112-121           | 567.08 | ICDIAAELAR           |
| 242-252           | 587.25 | SLVEIADTVPK          |
| 420-439           | 722.32 | YAACNAVGMQTDFFPGFQK  |
| 445-460           | 902.35 | VIALLOTMEDQGNQR      |
| 500-506           | 436.65 | LQELIQK              |
| 560-573           | 737.95 | TIECISLIGLAVGK       |
| 682-693           | 717.07 | STACQMLVCYAK         |
| 697-708           | 715.34 | EGFVEYTEQVVK         |
| 759-778           | 716.96 | AIGTEPDSVDLSEIMHSFAK |
| 965-985           | 612.92 | TKENVNATENCISAVGK    |

**B**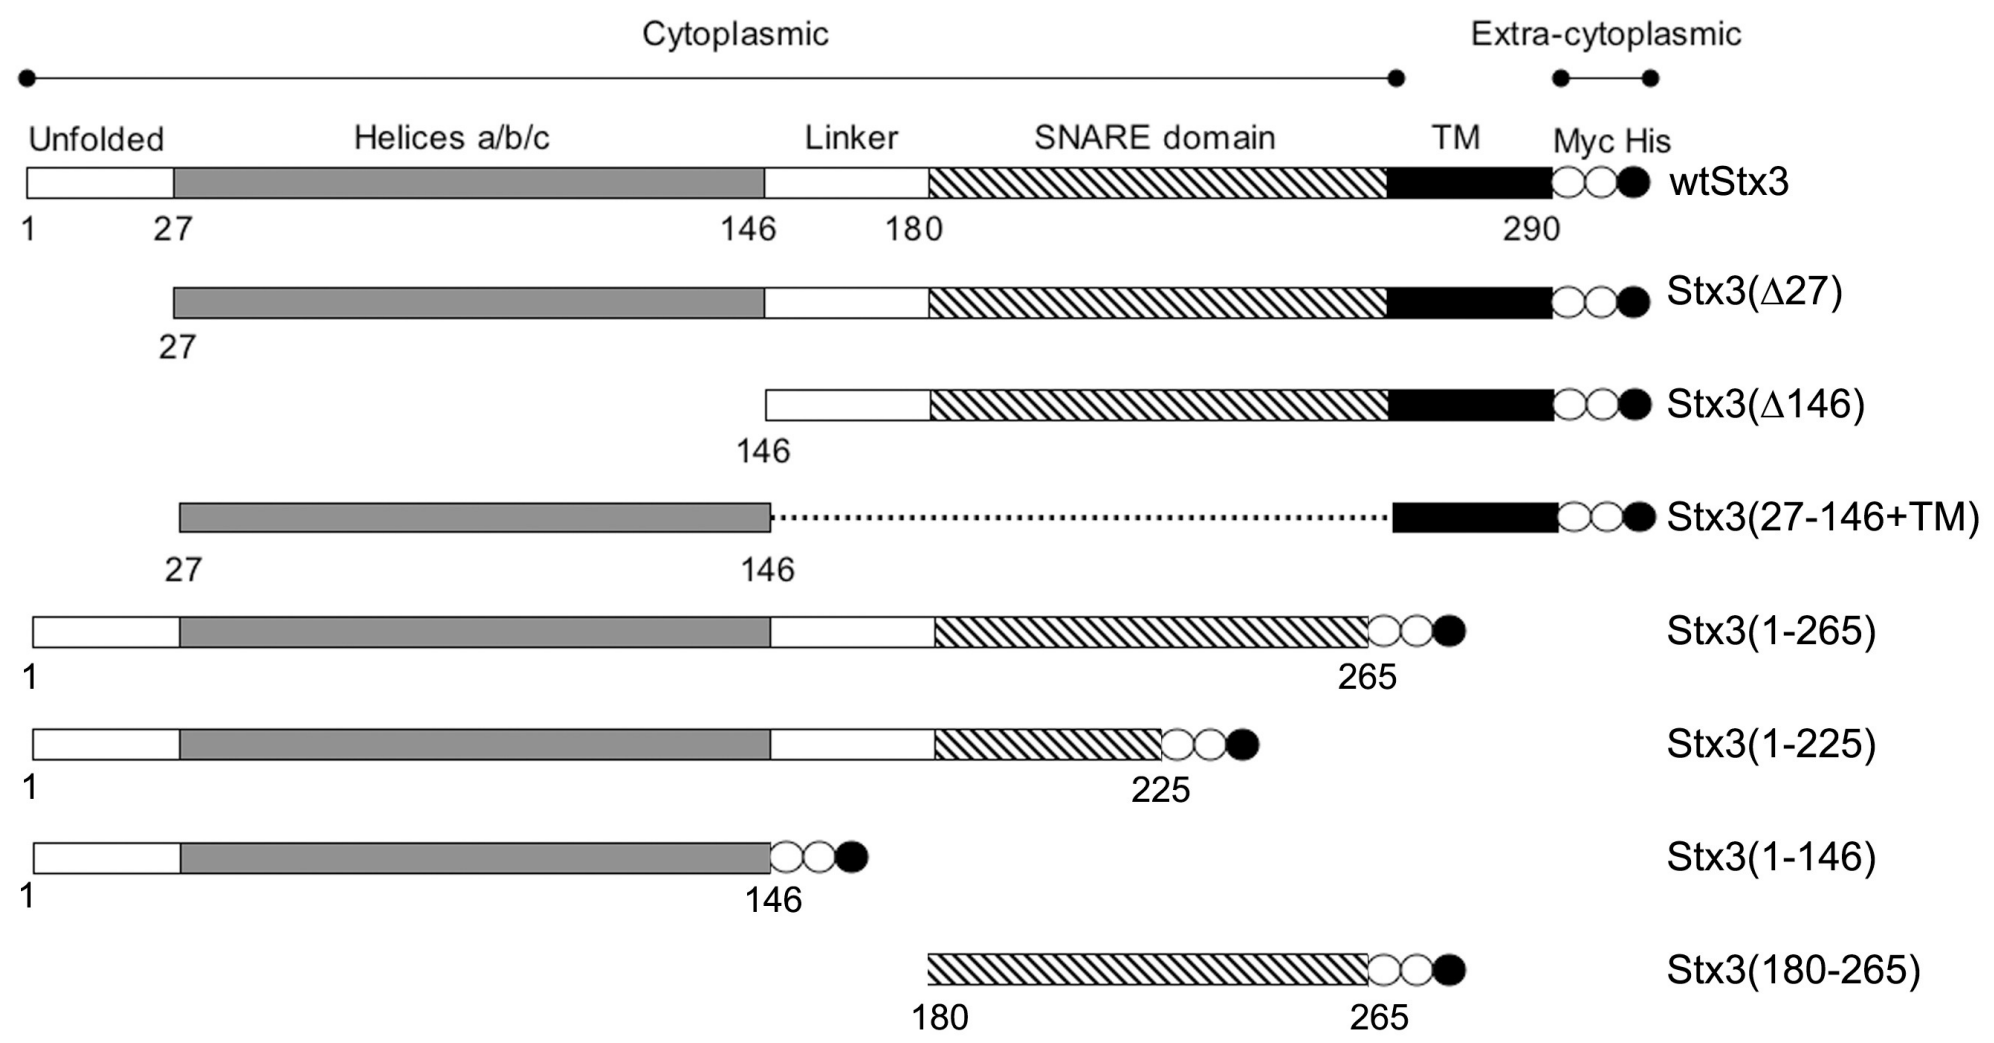

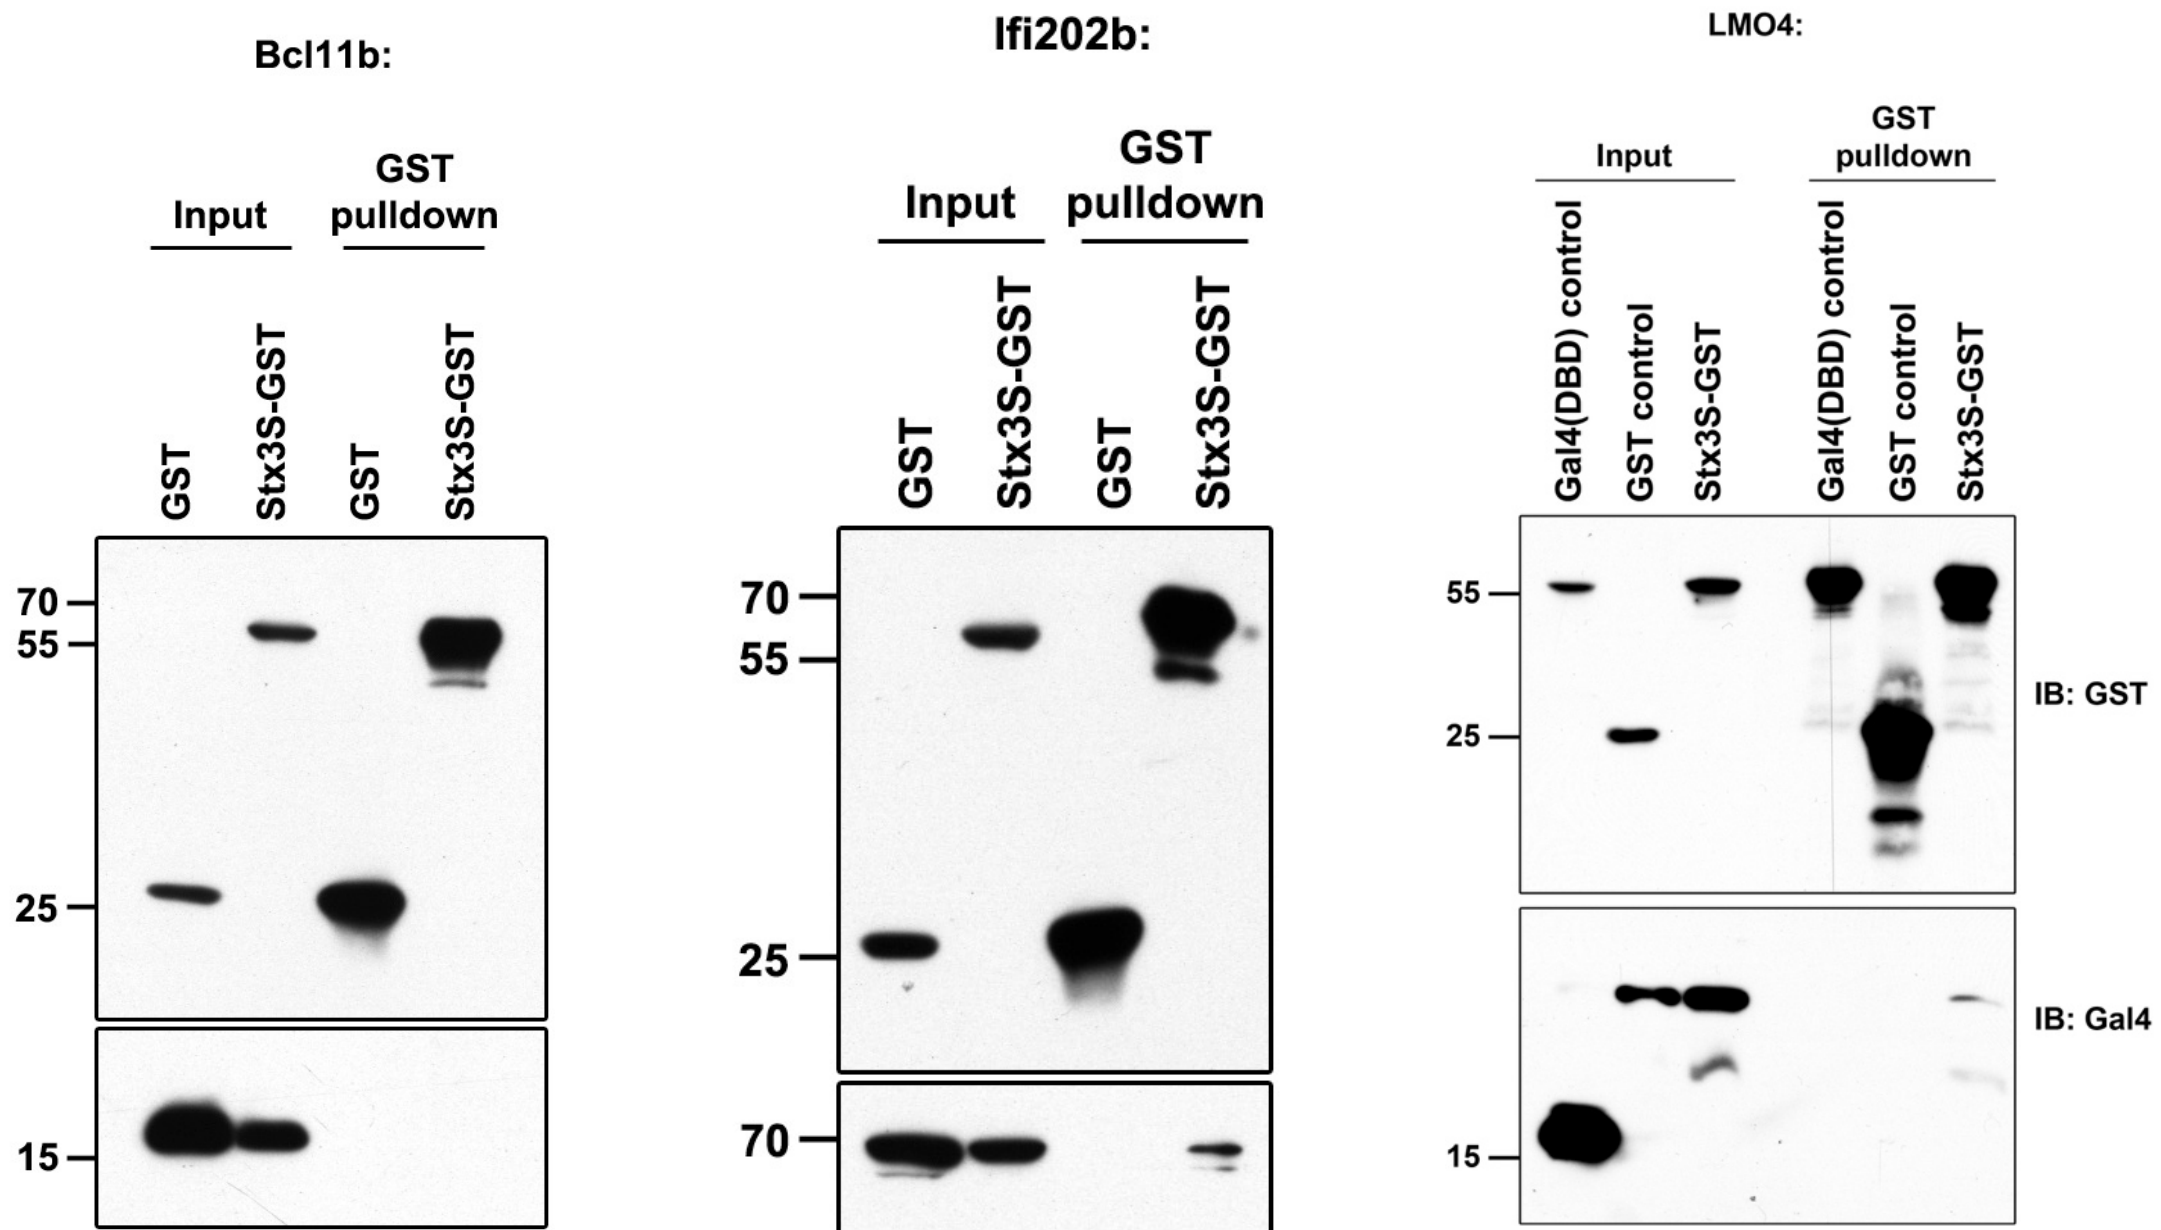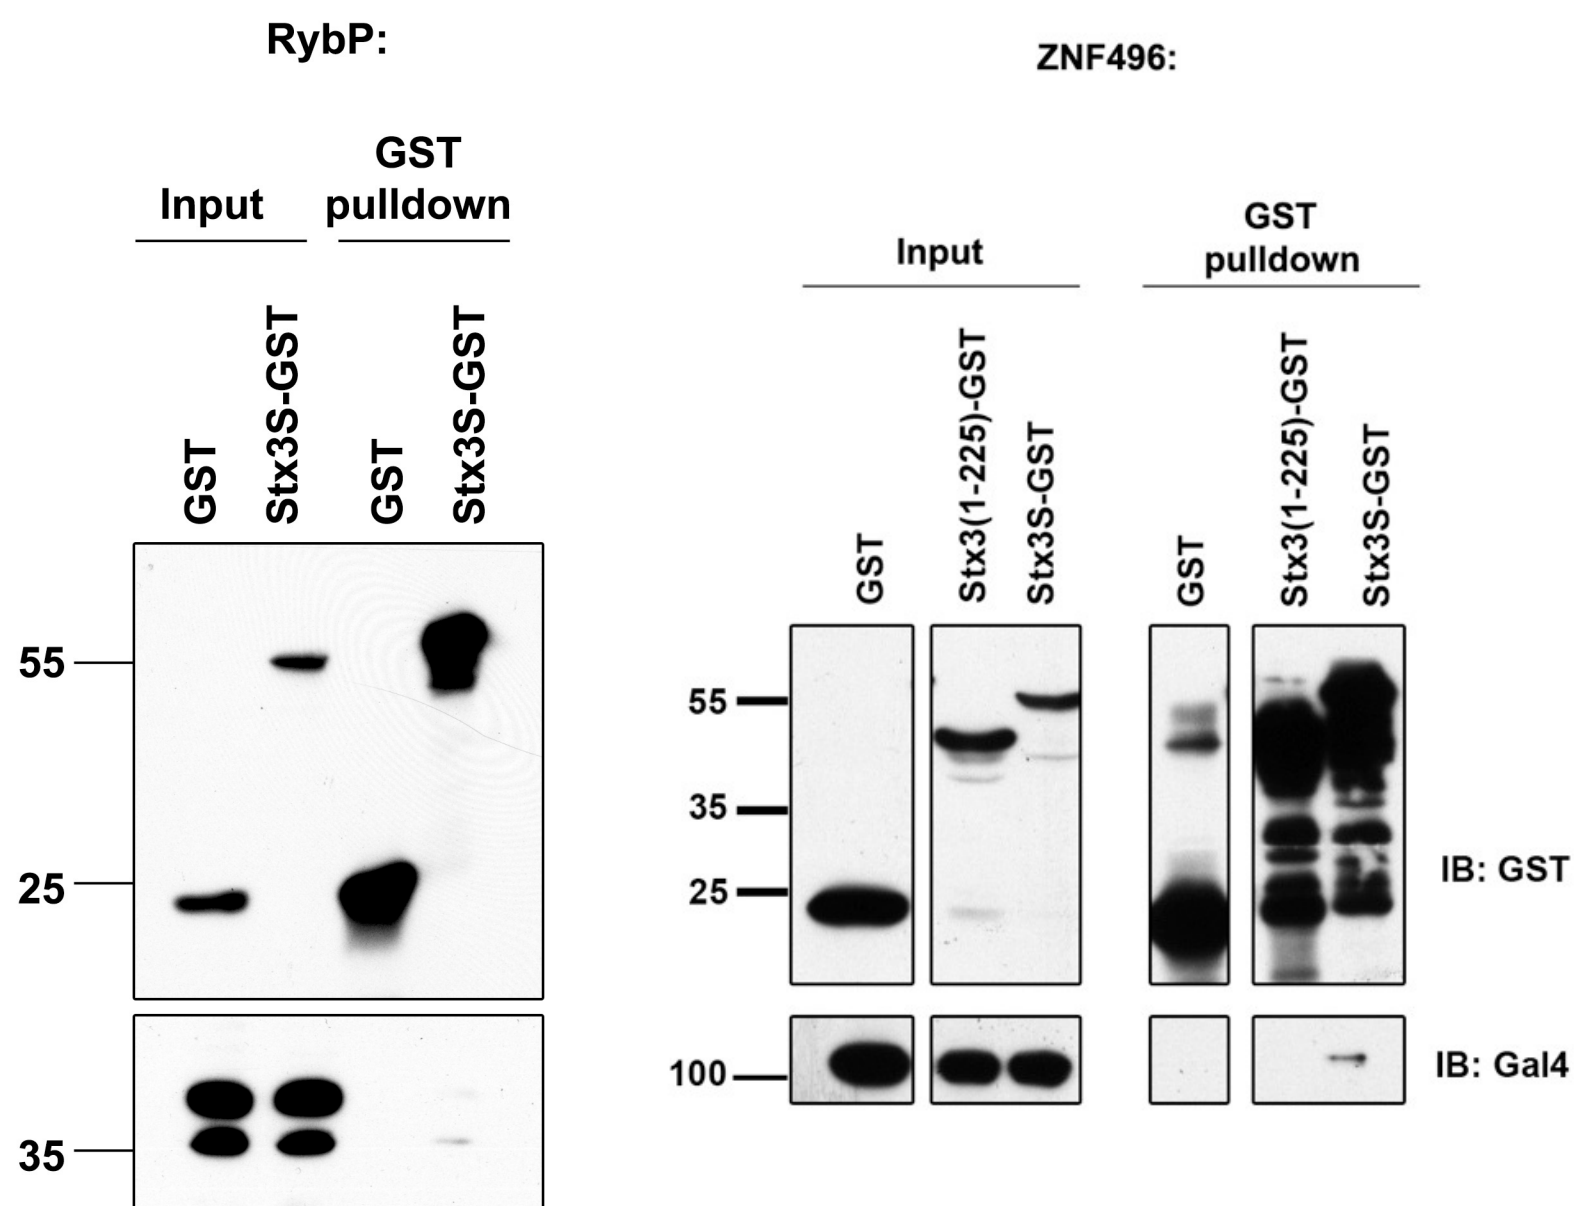

Fig. S2

**A**

|                                                                               |                |                      |                       |
|-------------------------------------------------------------------------------|----------------|----------------------|-----------------------|
|                                                                               | exon 9/exon 11 |                      |                       |
| 757                                                                           | 786            | 787                  | 834                   |
| GCTGTGAAATACCAGAGTCAGGCCCGGAAGAACTGATTTCACTCCAGACTGGTGTGGCCACCCTTGTCTTCAGATGA |                |                      |                       |
|                                                                               | C1             | GCCCGGAAGAACTGATTTCA |                       |
|                                                                               | C2             | CCGGAAGAACTGATTTCACT |                       |
|                                                                               | C3             |                      | GCCACCCTTGTCTTCAGATGA |
|                                                                               | C4             | GGAAGAACTGATTTCACTCC |                       |
|                                                                               | C5             | CAGGCCCGGAAGAACTGATT |                       |

**B**

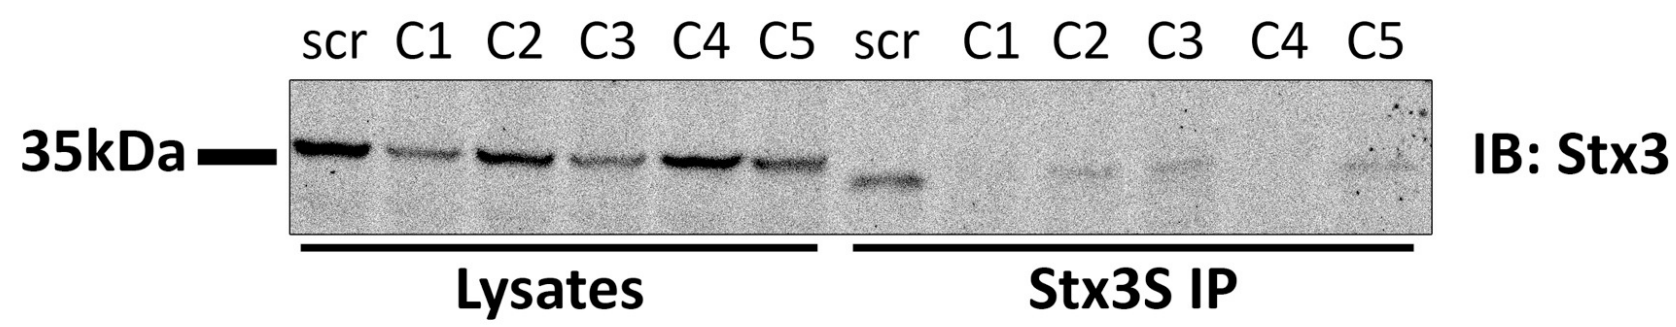

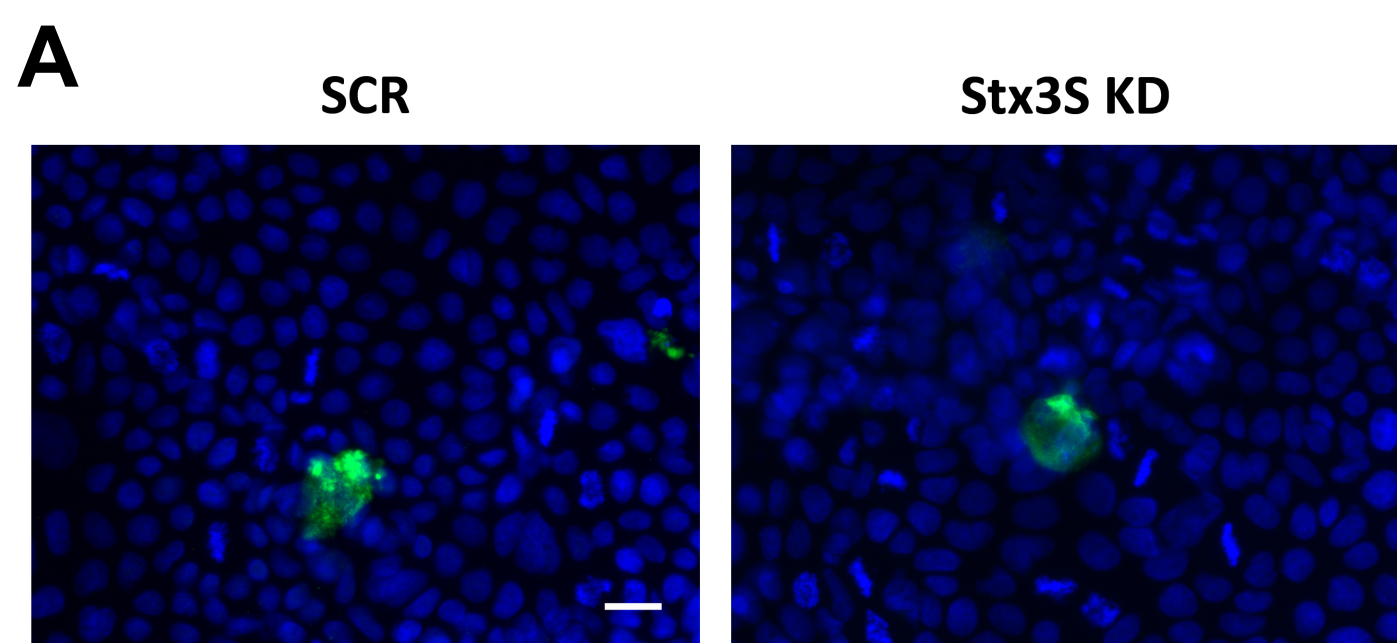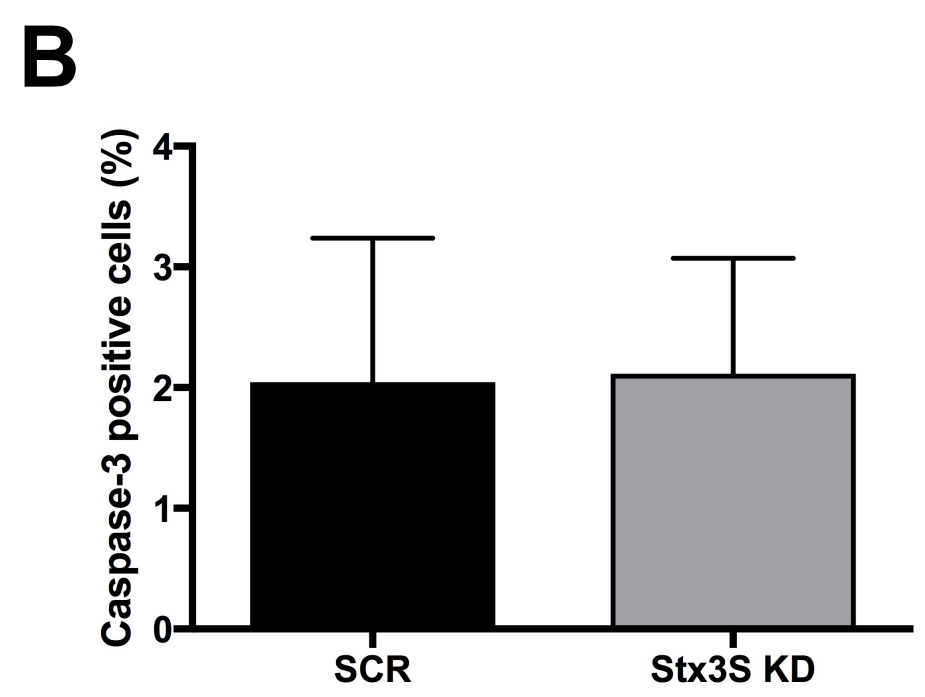

Supplement: Supplementary file [file 162958-1.pdf]
